# Supplementary material for: Epidemiology and burden of multidrug-resistant bacterial infection in a developing country
Source: eLife. 2016 Sep 6;5:e18082. doi: 10.7554/eLife.18082 (PMC5030096; doi:10.7554/eLife.18082)
Supplement: Figure 7—source data 1. — DOI: http://dx.doi.org/10.7554/eLife.18082.017 [file elife-18082-fig7-data1.xlsx]

## Sheet: Sheet1
Infection acquisition	Organisms	Mortality in patients infected with MDR Organisms	Mortality in patients infected with non-MDR Organisms
Community-acquired bacteraemia	Staphylococcus aureus	43% (40/94)	32% (348/1082)
Community-acquired bacteraemia	Enterococcus spp	NA	31% (55/176)
Community-acquired bacteraemia	Escherichia coli	33% (388/1177)	26% (566/2205)
Community-acquired bacteraemia	Klebsiella pneumoniae	41% (60/146)	43% (373/864)
Community-acquired bacteraemia	Pseudomonas aeruginosa	54% (7/13)	51% (138/273)
Community-acquired bacteraemia	Acinetobacter spp	43% (54/125)	35% (115/324)
Community-acquired bacteraemia	Subtotal	35% (54/1555)	32% (1595/4294
Healthcare-associated bacteraemia	Staphylococcus aureus	41% (30/73)	30% (56/186)
Healthcare-associated bacteraemia	Enterococcus spp	NA	45% (22/49)
Healthcare-associated bacteraemia	Escherichia coli	45% (131/288)	34% (71/206)
Healthcare-associated bacteraemia	Klebsiella pneumoniae	52% (37/71)	40% (50/125)
Healthcare-associated bacteraemia	Pseudomonas aeruginosa	50% (5/10)	48% (45/93)
Healthcare-associated bacteraemia	Acinetobacter spp	76% (44/58)	35% (20/57)
Healthcare-associated bacteraemia	Subtotal	49% (247/500)	37% (264/716)
Hospital-acquired bacteraemia	Staphylococcus aureus	44% (97/222)	33% (74/224)
Hospital-acquired bacteraemia	Enterococcus spp	50% (2/4)	50% (56/113)
Hospital-acquired bacteraemia	Escherichia coli	50% (126/252)	40% (60/151)
Hospital-acquired bacteraemia	Klebsiella pneumoniae	43% (130/301)	48% (74/154)
Hospital-acquired bacteraemia	Pseudomonas aeruginosa	64% (29/45)	60% (81/134)
Hospital-acquired bacteraemia	Acinetobacter spp	68% (256/374)	30% (38/127)
Hospital-acquired bacteraemia	Subtotal	53% (640/1198)	42% (383/903)
